# Supplementary material
Source: PubMed Central journal article supplement (PMC4679355)
Supplement: thnov06p0065s2.pdf [file thnov06p0065s2.pdf]

## **Glycoproteomic Approach Identifies KRAS as a Positive Regulator of CREG1 in Non-small Cell Lung Cancer Cells**

David J. Clark<sup>1,2</sup>, Yuping Mei<sup>1</sup>, Shisheng Sun<sup>3</sup>, Hui Zhang<sup>3</sup>, Austin J. Yang<sup>2</sup>, Li Mao<sup>\*1,2</sup>

<sup>1</sup> Department of Oncology and Diagnostic Sciences, University of Maryland School of Dentistry, Baltimore, MD

<sup>2</sup> Marlene and Stewart Greenebaum Cancer Center, University of Maryland, Baltimore, MD

<sup>3</sup> Department of Pathology, John Hopkins University, Baltimore, MD

\* Corresponding Author

Department of Oncology and Diagnostic Sciences

University of Maryland School of Dentistry

650 W. Baltimore St., Baltimore, MD 21201, USA

E-mail: Lmao@umaryland.edu

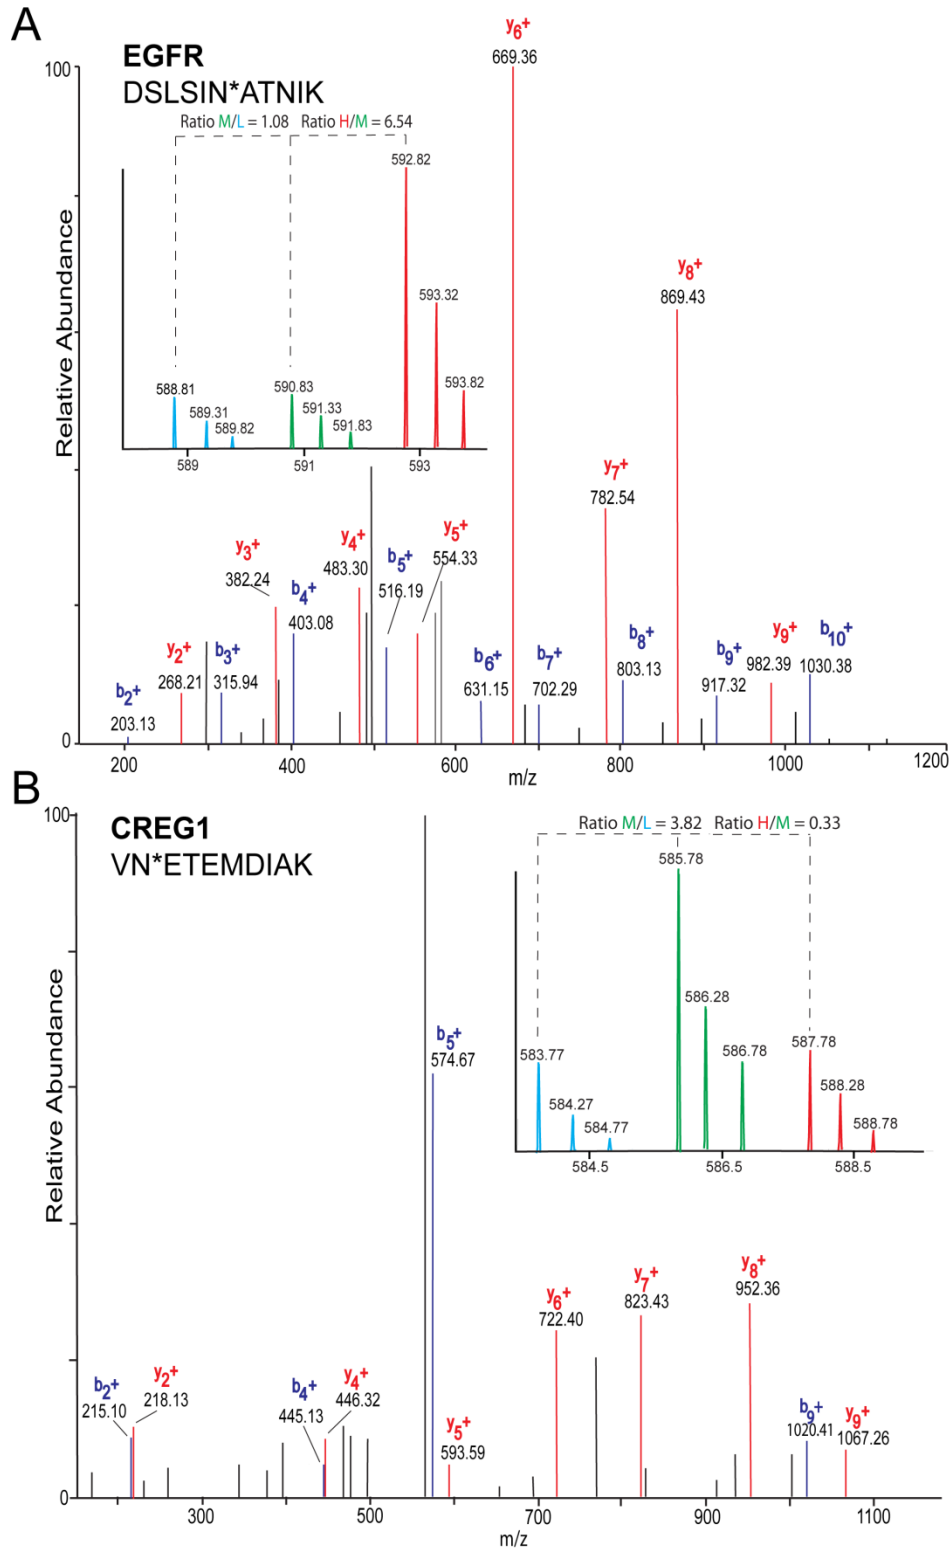

Figure S1. MS/MS mass spectrum of the identified glycopeptide. b- (blue) and y- (red) fragments allow for the mapping of the site of glycosylation as indicated by \*. Inset is representative MS1 spectrum of the quantified glycopeptide derived from each cell line: HBE4-L (light blue), A549-M (green), and HCC827-H (red). (A) DSLSINATNIK derived from EGFR, and (B) VN\*ETEMDIK derived from CREG1.

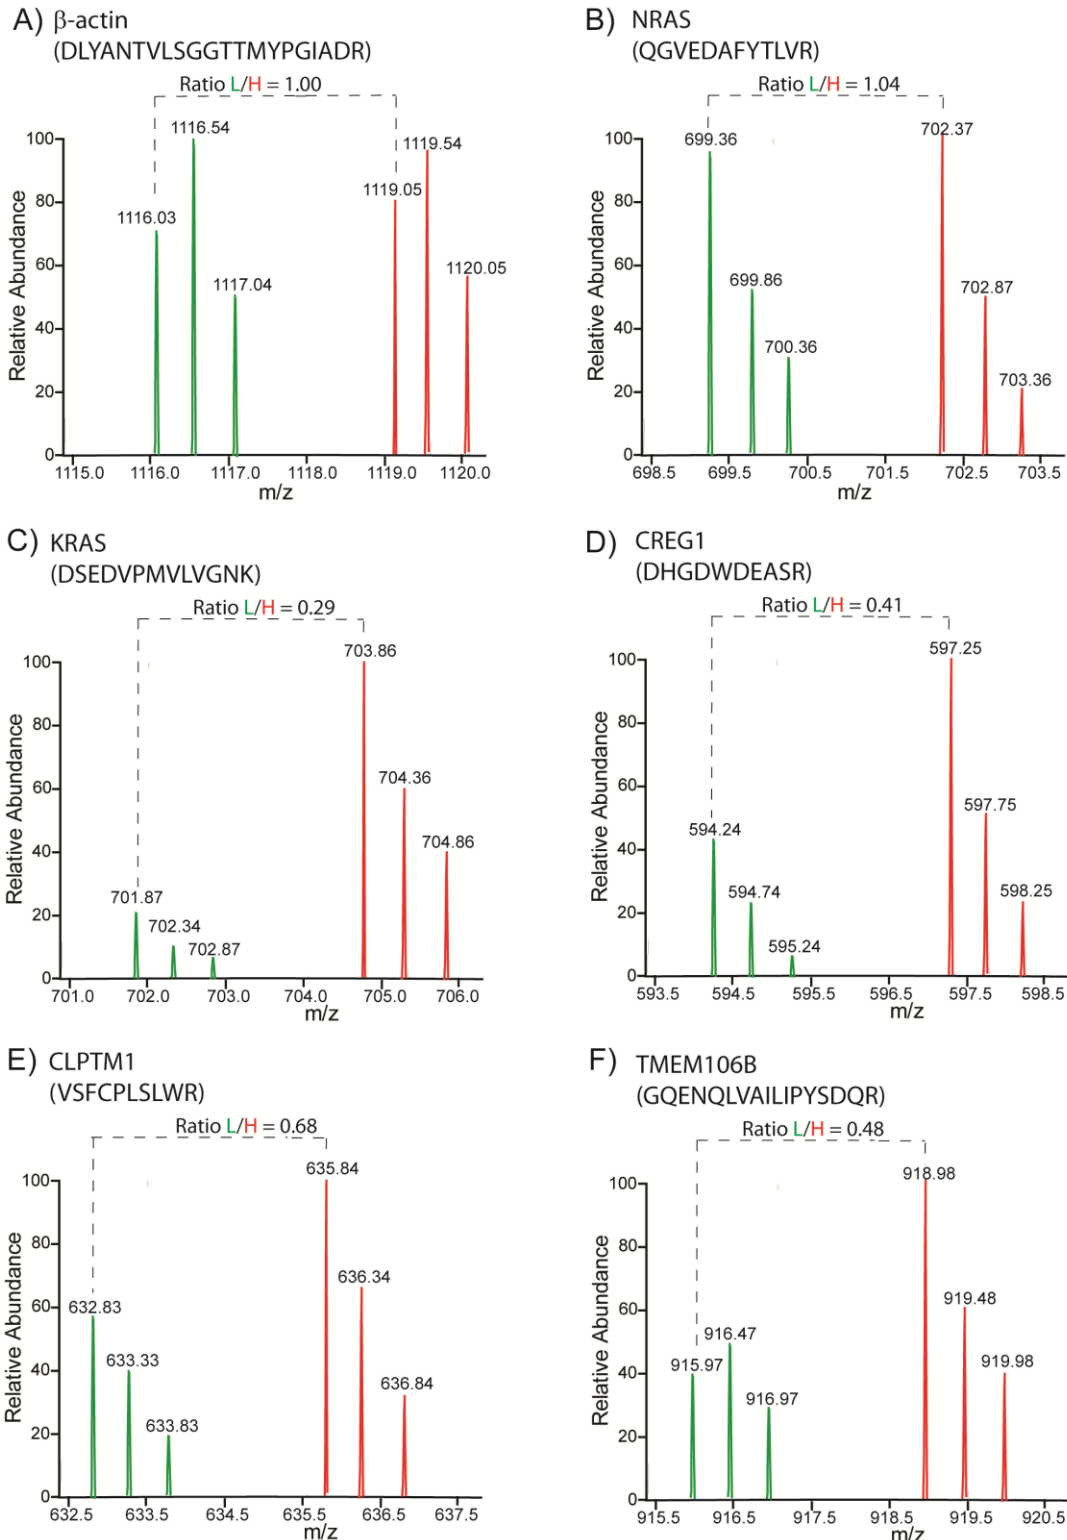

Figure S2. Representative MS1 spectra from Double SILAC analysis of isotopically labeled light (L) <sup>siRNA-KRAS</sup>A549 -K0R0 (green) cells compared to labeled heavy (H) A549-K4R6 (red) cells.  $\beta$ -actin and NRAS peptide levels remain in 1:1 ratio (A&B), whereas reduced peptide levels were observed in KRAS, CREG1, CLPTM1, and TMEM106B as a result of siRNA targeting KRAS (C-F).
